# Supplementary material
Source: PubMed Central journal article supplement (PMC4142984)

## MATERIALS AND METHODS

**RPT Expression and Purification.** Human RPT (amino acids 315–444) mutants were generated by site directed mutagenesis using Stratagene Quickchange kit (Agilent Technologies). Single point mutations were performed using the RPT pET21a(+) construct as a template.<sup>[1]</sup> Multiple mutations were generated sequentially.

List of primers used to design RPT mutants. For RPT truncation, sample name is displayed as amino acid (aa) numbers.

| RPT mutant   | 5' Primer                         | 3' Primer                        |
|--------------|-----------------------------------|----------------------------------|
| E404A        | ATGACACCTGCAGCGGTATCAATTGTG       | CACAATTGATACCGCTGCAGGTGTCAT      |
| E404Q        | ATGACACCTGCACAGGTATCAATTGTG       | CACAATTGATACCTGTGCAGGTGTCAT      |
| E422A        | GTAACAACCTACAGCGTGGGTGGAGACC      | GGTCTCCACCCACGCTGTAGTTGTTAC      |
| E422Q        | GTAACAACCTACACAGTGGGTGGAGACC      | GGTCTCCACCCACTGTGTAGTTGTTAC      |
| E425A        | ACAGAGTGGGTGGCGACCACAGCTAGAG      | CTCTAGCTGTGGTCCGCCACCCACTCTG     |
| E425Q        | ACAGAGTGGGTGCAGACCACAGCTAGAG      | CTCTAGCTGTGGTCTGCACCCACTCTGT     |
| E430A        | ACCACAGCTAGAGCGCTACCTATCCCTG      | CAGGGATAGGTAGCGCTCTAGCTGTGGT     |
| E430Q        | ACCACAGCTAGACAGCTACCTATCCCTG      | CAGGGATAGGTAGCTGTCTAGCTGTGGT     |
| E422A /E425A | GGTAACAACCTACAGCGTGGGTGGCGACC     | GGTCCGCCACCCACGCTGTAGTTGTTAC     |
| E422Q /E425Q | GGTAACAACCTACACAGTGGGTGCAGACC     | GGTCTGCACCCACTGTGTAGTTGTTACC     |
| Δ404-410     | GTATGACACCTGCAGAGTCTGGAACCACAGCTG | CAGCTGTGGTTCAGACTCTGCAGGTGTCATAC |

Recombinant RPT and mutants were expressed in BL21(DE3) RIPL cells and purified as previously described.<sup>[1]</sup> Protein concentrations were determined using a molar extinction coefficient estimated on the basis of amino-acid content:  $\epsilon_{280\text{ nm}} = 5,500\text{ M}^{-1}\text{ cm}^{-1}$ . Purity and homogeneity of samples were assessed by SDS PAGE. Protein molecular weights were confirmed by ESI-MS (NHLBI Biochemistry Core Facility). Purified protein was stored short term (less than 2 weeks) at 4 °C in pH 7.5 buffer (6M GuHCl, 100 mM Na<sub>2</sub>HPO<sub>4</sub>, 100 mM NaCl, 200 mM imidazole).

**Fibril Aggregation/Disaggregation.** Purified wild-type and mutant RPT were buffer exchanged twice using PD-10 columns (GE Healthcare) prior to aggregation by first desalting into pH 8.5 buffer (20 mM tris(hydroxymethyl)aminomethane (Tris), 100 mM NaCl) followed by the appropriate aggregation buffer (pH 5–5.5; 20 mM sodium acetate (NaOAc), 100 mM NaCl, pH 6–6.5; 20 mM 2-(N-morpholino)ethanesulfonic acid (MES), 100 mM NaCl and pH 7; 20 mM 3-(N-morpholino)propanesulfonic acid (MOPS), 100 mM NaCl). All buffers were filtered (0.2 μm). Final protein solutions (30 μM) were filtered through YM-100 filters (Millipore) to remove any preformed aggregates. Aggregation experiments were performed in sealed 96-well flat bottom plates (Corning Costar) containing 2-mm sterile glass beads to facilitate orbital shaking (1 mm, ca. 87.6 rpm) at 37 °C. A solution containing 200 μL protein supplemented with 10 μM thioflavin T (ThT) was measured by ThT (excitation and emission wavelengths were 415 and 480 nm, respectively) and Trp (excitation and emission wavelengths were 280 and 350 nm, respectively) fluorescence as a function of time using a Tecan Infinite M200 Pro microplate reader.

For fibril disaggregation experiments, pre-aggregated RPT samples at pH 5 (500 μL containing 30 μM RPT and 10 μM ThT) were titrated with increments of 1 M NaOH (0.25–0.5 μL) to adjust the pH. Samples were measured by Trp fluorescence ( $\lambda_{\text{ex}} = 295\text{ nm}$ ,  $\lambda_{\text{obs}} = 300\text{--}500\text{ nm}$ , 0.3 s integration time, 1 nm slits, 25 °C) in 1-cm quartz cuvettes using a Fluorolog 3 spectrofluorometer (Horiba Jobin Yvon). The

apparent extent or kinetics of dissolution at individual pH condition is pH dependent, *i.e.* higher the pH, faster the disassembly. In order to compare all data sets, an equilibration time of 10 minutes was chosen for practical purposes.

**Circular Dichroism (CD) Spectroscopy.** CD measurements (200 to 260 nm, 1 nm bandwidth, and continuous mode with a scanning rate of 100 nm/min) were performed in 1 mm cuvettes using a Jasco J-715 spectropolarimeter (Jasco Analytical Instruments). Each experiment is reported as an average of 3 accumulated scans. All measurements were performed at 25 °C. Data were analyzed using Igor 6.2 (Wavemetrics). The mean residue ellipticity was calculated using the equation:  $[\Theta] = (100\theta)/(c \cdot l \cdot n)$ , where  $\theta$  is the measured CD signal in mdeg,  $c$  is the protein concentration in mM,  $l$  is the path length in cm, and  $n$  is the number of amino acids.

**Transmission Electron Microscopy.** Samples (5  $\mu$ L) taken after each aggregation run were deposited on TEM grids (400-mesh formvar and carbon coated copper, Electron Microscopy Sciences), incubated for 5 min, wicked with filter paper, followed by the addition of 5  $\mu$ L of 1-2% (w/v) aqueous uranyl acetate solution. After incubating for 5 min, excess uranyl acetate was wicked away and grids were allowed to air dry. TEM was performed using a JEOL JEM 1200EX transmission electron microscope (accelerating voltage 80 keV) equipped with an AMT XR-60 digital camera (NHLBI TEM Core Facility).

**Limited PK digestion.** Proteinase K (Promega) digestion was performed by incubating 2  $\mu$ g/ml proteinase K with 90  $\mu$ M preformed RPT fibrils. Reactions were performed in 20 mM sodium acetate, 100 mM NaCl, pH 5.0, at room temperature in a total volume of 1.0 ml. The reactions were terminated by the addition of 4% TCA. Samples were lyophilized and resuspended in 5% acetic acid prior to LC-MS analysis (NIDDK, Advanced Mass Spectrometry Facility). For N-terminal sequencing, PK-resistant fragments were separated using a 10-20% Tricine gel and transferred to polyvinylidene difluoride (PVDF). Bands were excised from PVDF and submitted to the Keck Biotechnology Resource Laboratory.

- [1] R. P. McGlinchey, F. Shewmaker, P. McPhie, B. Monterroso, K. Thurber, R. B. Wickner, *Proc. Natl. Acad. Sci. U. S. A.* **2009**, *106*, 13731-13736.

**Table S1.** Proteinase K resistant fragments generated after limited digestion of RPT fibrils. Samples were analysed by SDS-PAGE and LC-MS. N-terminal sequencing was performed on bands excised from PVDF.

| <b>Amino acids</b> | <b>Sequence</b>                                                                              | <b>Expected mass</b> | <b>Actual mass</b> |
|--------------------|----------------------------------------------------------------------------------------------|----------------------|--------------------|
| 371–444            | STGMTPEKV<br>PVSEVMGTTLAEMSTPEATGMTPAEV<br>SIVVLSGTTAAQVTTTEWVETTAREL<br>PIPEPEGPDASSIHHHHHH | 8427.36              | 8426.51            |
| 390–444            | AEMSTPEATGMTPAEV<br>SIVVLSGTTAAQVTTTEWVETTAREL<br>PIPEPEGPDASSIHHHHHH                        | 6481.10              | 6480.10            |
| 393–444            | STPEATGMTPAEV<br>SIVVLSGTTAAQVTTTEWVETTAREL<br>PIPEPEGPDASSIHHHHHH                           | 6149.17              | 6149.71            |
| 400–444            | MTPAEV<br>SIVVLSGTTAAQVTTTEWVETTAREL<br>PIPEPEGPDASSIHHHHHH                                  | 5506.06              | 5505.71            |

**Note:** Peptide sequences shown above were confirmed by N-terminal sequencing.

**Figure S1.** Disaggregation of wild-type RPT fibrils monitored by ThT emission. Samples (30  $\mu\text{M}$ ) were taken after aggregating at pH 5 and pH was carefully adjusted by adding small volumes of 1 M NaOH from pH 5–7 (black-to-light grey, respectively). Each scan was taken after a 10-min equilibration at the corresponding pH.

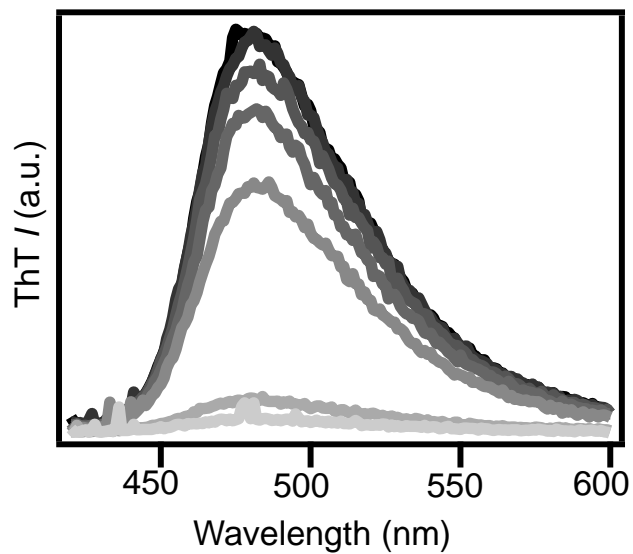

**Figure S2.** Representative TEM images for single Ala- and Gln-mutants (A) E404A, (B) E422Q, (C) E425Q and (D) E430Q taken after aggregation at pH 5. Scale bar is 100 nm.

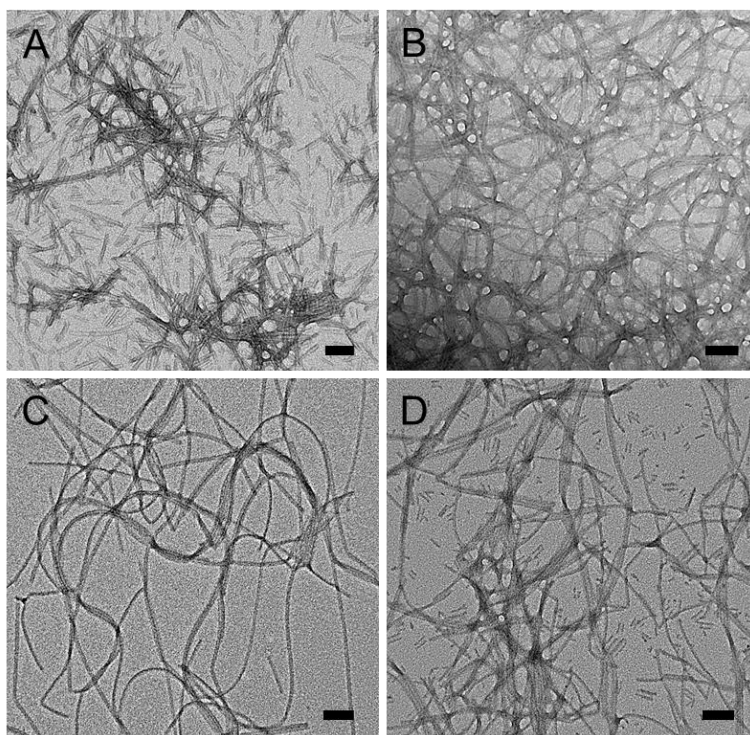

**Figure S3.** Aggregation kinetics of E422A (left) and E422Q (right) monitored by W423 emission at pH 5 (red), 5.5 (blue), 6 (green), 6.5 (pink) and 7 (purple). Graphs are plotted on the same scale (15000– 27000 a.u.). Note incubation times were continued beyond 170 h to show no aggregation occurred at pH 7.

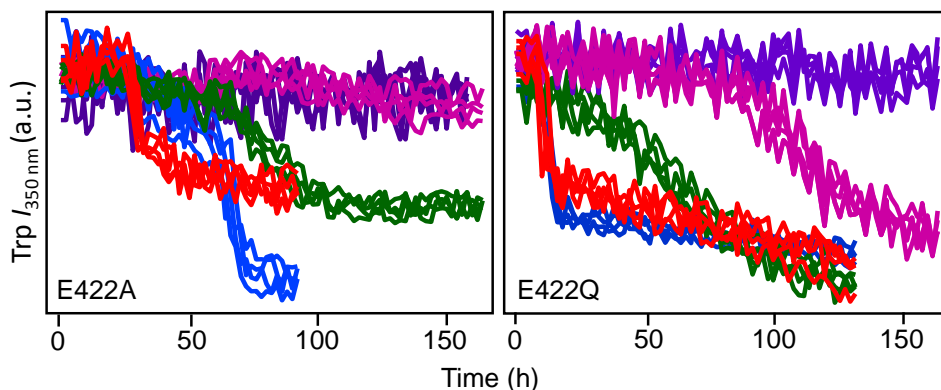

**Figure S4.** Disaggregation of E422Q fibrils monitored by W423 and ThT emission. Samples (30  $\mu$ M) were taken after aggregating at pH 5 and pH was carefully adjusted by adding small volumes of 1 M NaOH. Each scan was taken after a 10-min equilibration at the corresponding pH (see legend).

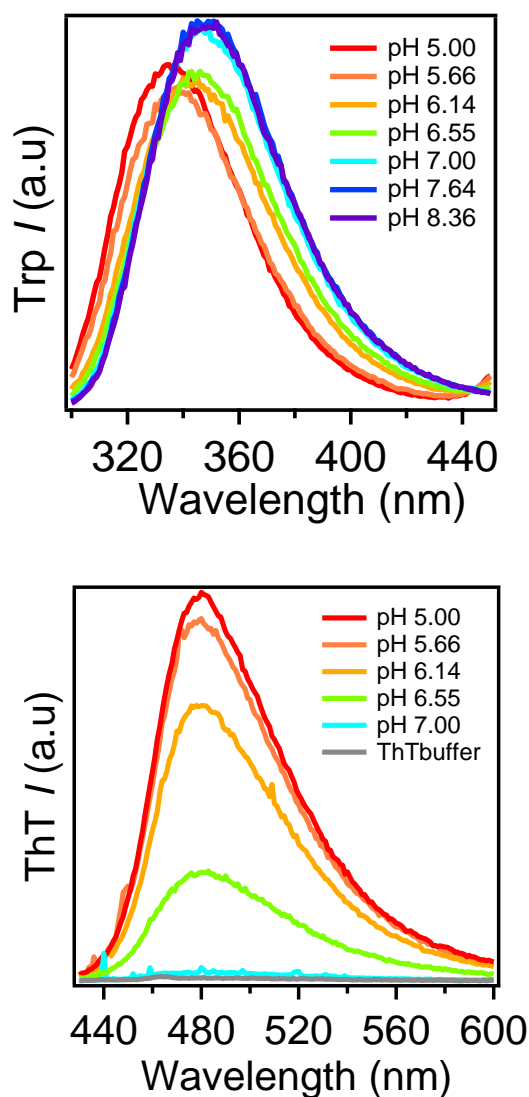

**Figure S5.** Aggregation kinetics of single Ala/Gln mutants at E404, E425 and E430 at pH 6 monitored by ThT emission. Continued incubation showed no changes in fluorescence for E425A/Q and E430A/Q mutants. ThT intensity scale is (0–20000 a.u.).

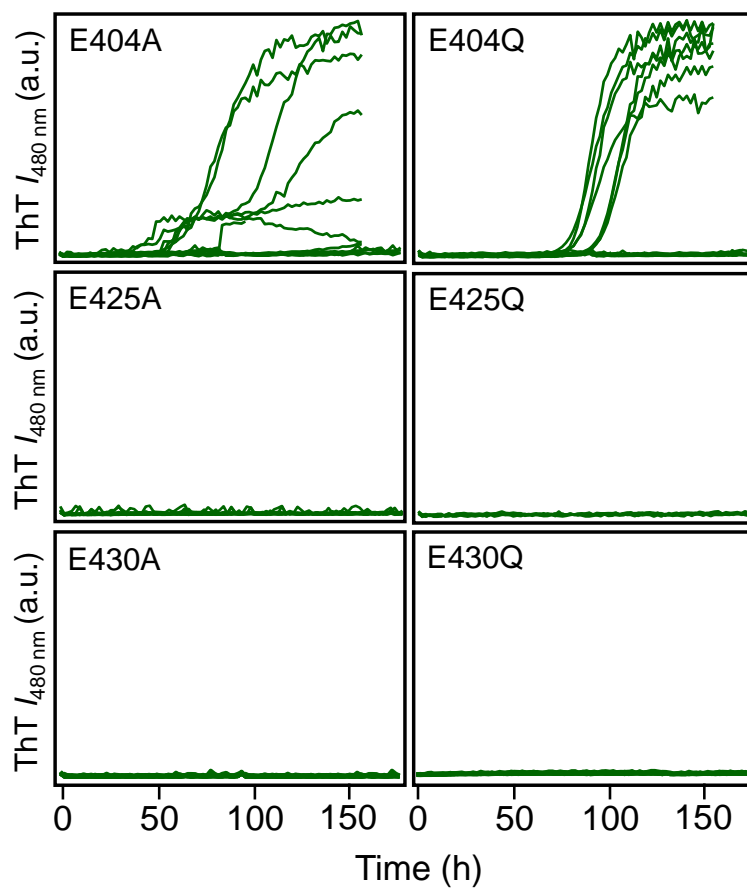

**Figure S6.** Aggregation kinetics of E404A/E422A (top) and E422Q/E422Q (bottom) monitored by W423 emission at pH 5 (red), 6 (green), and 7 (purple). Graphs are plotted on the same scale (50000–15000 a.u.).

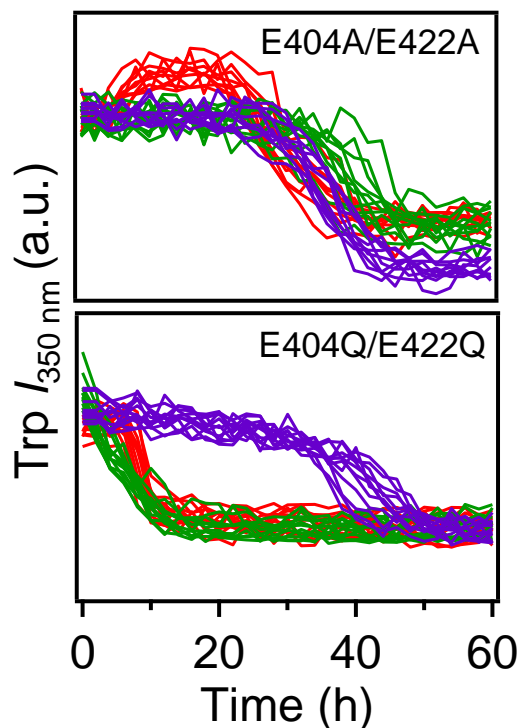

**Figure S7.** Far-UV CD spectra of (A) E404A/E422A and (B) E404Q/E422Q mutants aggregated at pH 5 (red), 6 (blue) and 7 (green). Start ( $T=0$ ) and end ( $T=\text{End}$ ) of aggregation were recorded.

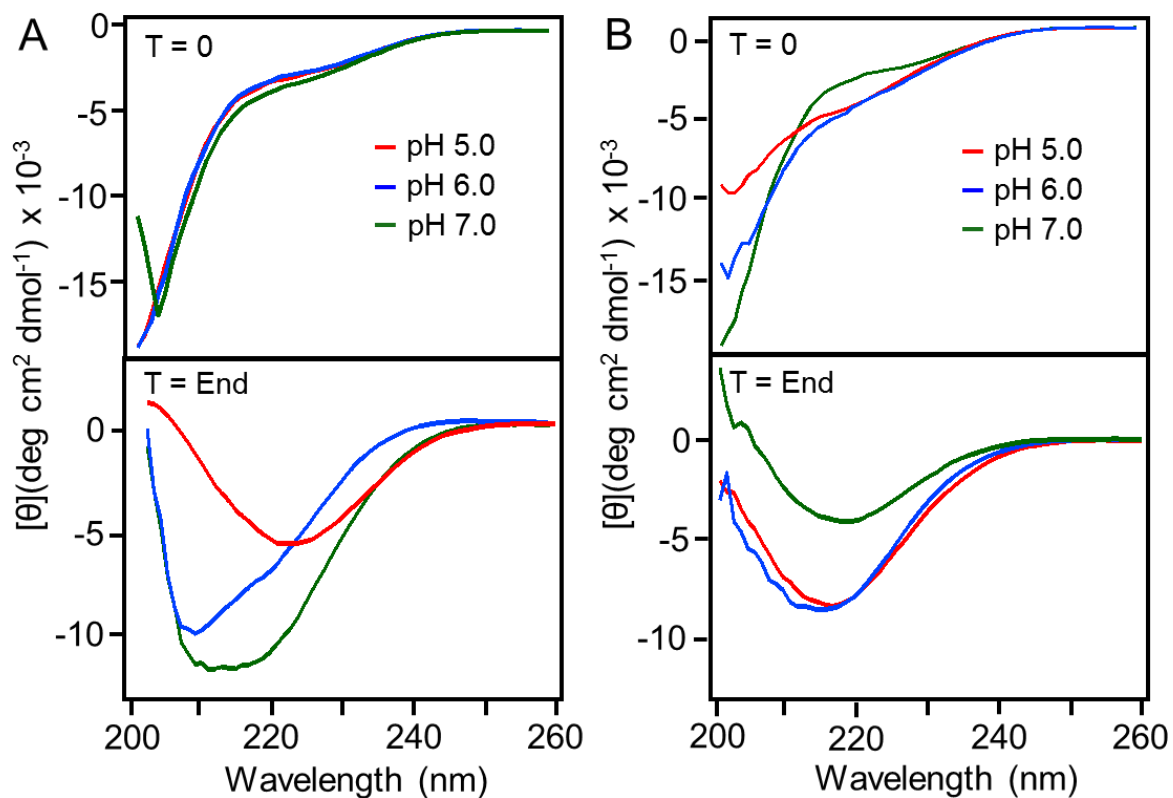

**Figure S8.** Disaggregation of E404Q/E422Q fibrils monitored by W423 and ThT emission. Samples (30  $\mu\text{M}$ ) were taken after aggregating at pH 5 and pH was carefully adjusted by adding small volumes of 1 M NaOH. Each scan was taken after a 10-min equilibration at the corresponding pH (see legend).

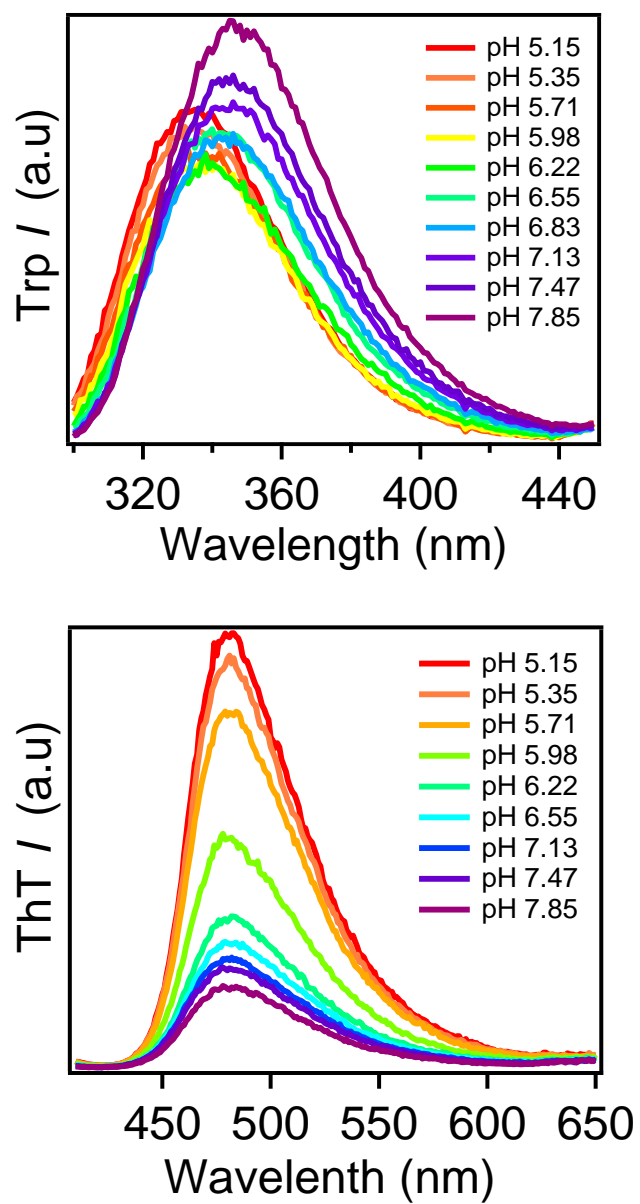



**Figure S9.** Aggregation kinetics of E404/E422/E425/E430Q (Quad Q) mutant at pH 5 (red), 5.5 (blue), 6 (green) 6.5 (pink) and 7 (purple). Samples were monitored by ThT (A) and Trp (B) fluorescence. ThT and Trp intensity scales are (0–38000 a.u.) and (10000–16000 a.u.), respectively. Representative TEM images of Quad Q fibrils formed from aggregating at pH 5–7. Scale bar is 100 nm.

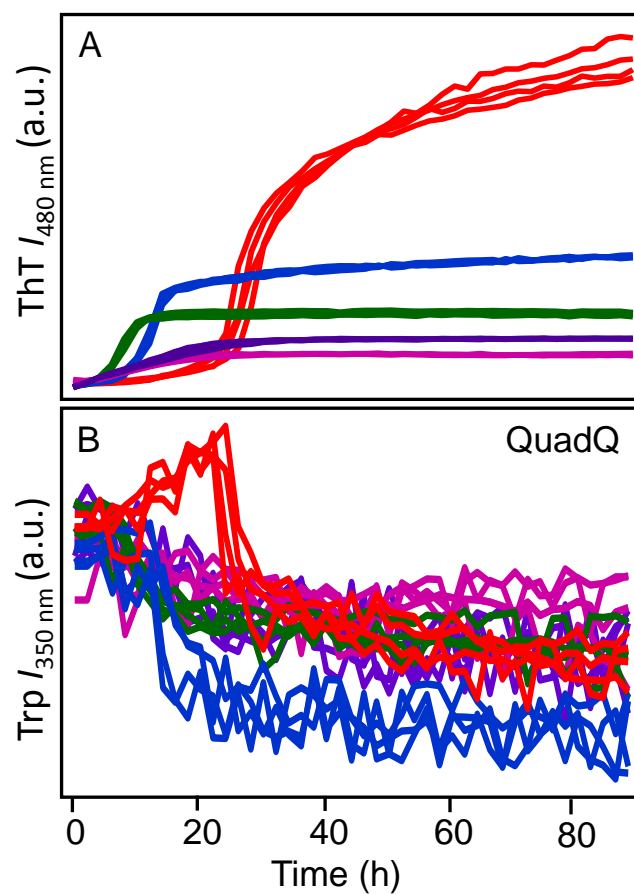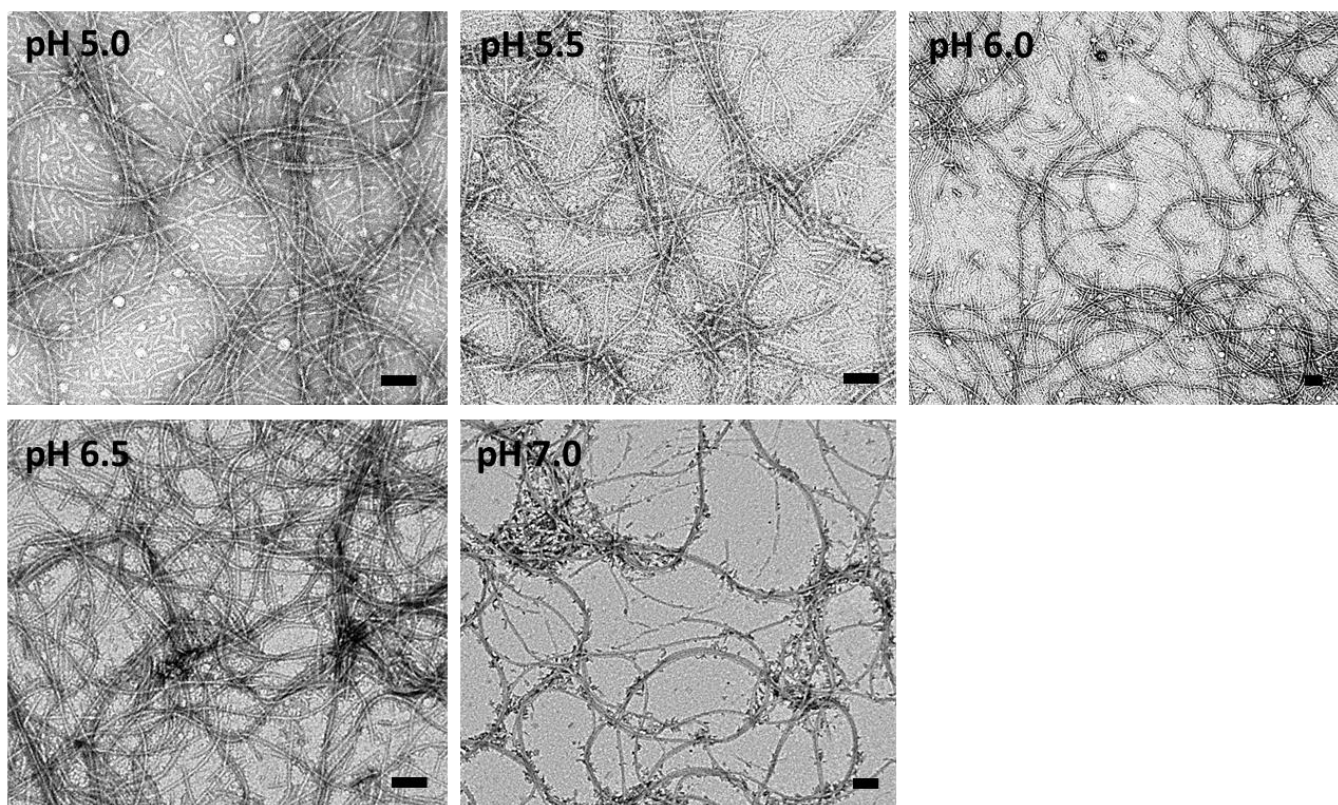

**Figure S10.** Aggregation kinetics of RPT truncation mutant  $\Delta 405\text{--}410$  monitored by (A) ThT and (B) W423 fluorescence at pH 5. ThT and Trp intensity scales are (0–1000 a.u.) and (20000–29000 a.u.), respectively. Incubation times were continued beyond 100 h and no changes were observed.

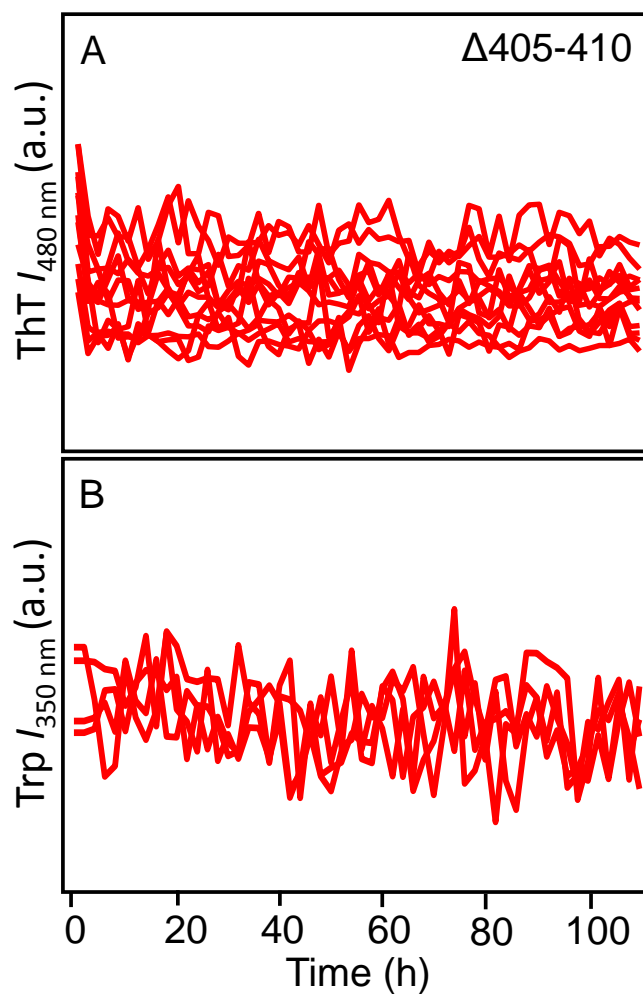

**Figure S11.** Schematic diagram depicting possible side chain orientations for E404 (green) and E422 (blue) as either outside or inside the  $\beta$ -strands of RPT filaments (**A–D**). Note only several residues are shown for each of the two proposed  $\beta$ -strands (403–411) and (415–423). G412 likely forms a  $\beta$ -turn linking the two strands and is not shown. Part of the critical amyloidogenic region, VSIVVL (cyan) is shown. Fibril axis is coming out of the page.

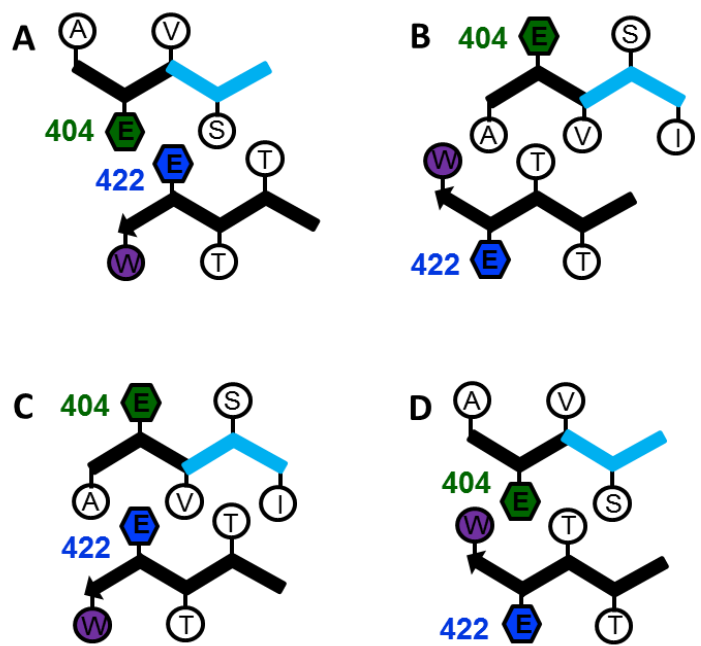

Supplement: NIHMS614739-supplement-Supporting_Information.pdf [file NIHMS614739-supplement-Supporting_Information.pdf]
